# Supplementary material for: Piglet colibacillosis diagnosis based on multiplex polymerase chain reaction and immunohistochemistry of paraffin-embedded tissues
Source: PubMed Central journal article supplement — J Vet Sci. 2018 Jan 23;19(1):27–33. doi: 10.4142/jvs.2018.19.1.27 (PMC5799396; doi:10.4142/jvs.2018.19.1.27), 2018-01-23
Supplement: jvs-19-27-s001.pdf [file jvs-19-27-s001.pdf]

**Supplementary Table 1.** Frequency of virulence factors genes according to the levels of immunohistochemistry staining

| Virulence factor  | Immunohistochemistry staining |               |                |                |
|-------------------|-------------------------------|---------------|----------------|----------------|
|                   | Negative                      | +             | ++             | +++            |
| STaP              | 2/28 (7.14%)                  | 9/18 (50.00%) | 15/28 (53.57%) | 26/58 (44.82%) |
| STb               | 3/28 (10.71%)                 | 3/18 (16.66%) | 8/28 (28.57%)  | 23/58 (39.65%) |
| F18               | 4/28 (14.28%)                 | 5/18 (27.77%) | 11/28 (39.28%) | 21/58 (36.20%) |
| LT                | 4/28 (14.28%)                 | 2/18 (11.11%) | 6/28 (21.42%)  | 11/58 (18.96%) |
| F41               | 0                             | 1/18 (5.55%)  | 5/28 (17.85%)  | 6/58 (10.34%)  |
| ST <sub>X2e</sub> | 2/28 (7.14%)                  | 0             | 1/28 (3.57%)   | 0              |
| F4                | 1/28 (3.57%)                  | 4/18 (22.22%) | 12/28 (42.85%) | 19/58 (32.75%) |
| F5                | 1/28 (3.57%)                  | 2/18 (11.11%) | 4/28 (14.28%)  | 11/58 (18.96%) |
| F6                | 2/28 (7.14%)                  | 4/18 (22.22%) | 4/28 (14.28%)  | 10/58 (17.24%) |

+, mild immunostaining; ++, moderate; +++, marked.
