# Supplementary material for: Piglet colibacillosis diagnosis based on multiplex polymerase chain reaction and immunohistochemistry of paraffin-embedded tissues
Source: PubMed Central journal article supplement — J Vet Sci. 2018 Jan 23;19(1):27–33. doi: 10.4142/jvs.2018.19.1.27 (PMC5799396; doi:10.4142/jvs.2018.19.1.27), 2018-01-23
Supplement: jvs-19-27-s002.pdf [file jvs-19-27-s002.pdf]

**Supplementary Table 2.** Frequency of virulence factors genes according to the age range

| Virulence factor  | Age range (%)         |                      |               |
|-------------------|-----------------------|----------------------|---------------|
|                   | Farrowing (0–21 days) | Weaning (22–60 days) | Unknown age   |
| STaP              | 17/47 (36.17%)        | 30/70 (42.85%)       | 5/15 (33.33%) |
| STb               | 10/47 (21.27%)        | 21/70 (30.00%)       | 6/15 (40.00%) |
| F18               | 9/47 (19.14%)         | 26/70 (37.14%)       | 6/15 (40.00%) |
| LT                | 5/47 (10.63%)         | 15/70 (21.42%)       | 3/15 (20.00%) |
| F41               | 4/47 (8.51%)          | 8/70 (11.42%)        | 0             |
| ST <sub>X2e</sub> | 2/47 (4.25%)          | 1/70 (1.42%)         | 0             |
| F4                | 11/47 (23.40%)        | 23/70 (32.85%)       | 2/15 (13.32%) |
| F5                | 6/47 (12.76%)         | 12/70 (17.14%)       | 0             |
| F6                | 6/47 (12.76%)         | 14/70 (20.00%)       | 0             |
